# Supplementary material for: Utility and precision evidence of technology in the treatment of type 1 diabetes: a systematic review
Source: PubMed Central journal article supplement (PMC10550996; doi:10.1038/s43856-023-00358-x), 2023-10-05
Supplement: 43856_2023_358_MOESM3_ESM.pdf [file 43856_2023_358_MOESM3_ESM.pdf]

## **Description of Additional Supplementary Files**

**File Name:** Supplementary Data 1

**Description:** Source data
